# Supplementary material for: Transformation optics with Fabry-Pérot resonances
Source: PubMed Central journal article supplement (PMC4345524; doi:10.1038/srep08680), 2015-03-03
Supplement: srep08680-s1.pdf [file srep08680-s1.pdf]

# Transformation optics with Fabry-Pérot resonances

M. M. Sadeghi\*, Sucheng Li\*, Lin Xu\*, Bo Hou<sup>1</sup>, and Huanyang Chen<sup>1</sup>

College of Physics, Optoelectronics and Energy, Soochow University, Suzhou 215006,  
China

\* These authors contributed equally to this work.

<sup>1</sup> Correspondence and requests for materials should be addressed to H.C. (chy@suda.edu.cn) or

B.H. (houbo@suda.edu.cn)

## Supplementary Notes

### Supplementary Note S1

In this supplementary note, we will analytically prove that for the following configuration, perfect transparency or invisibility could be achieved at the FP resonant conditions:

$$\varepsilon = \mu = 1, \text{ for } r \geq r_2 \text{ (Region 1);}$$

$$\varepsilon_r = \infty \text{ and } \varepsilon_\theta = \mu_z = 1, \quad r_1 \leq r < r_2 \text{ (Region 2);} \quad (\text{S1})$$

$$\varepsilon = \mu_z = \frac{r_2}{r_1}, \text{ for } 0 \leq r < r_1 \text{ (Region 3).}$$

We drop the primes here for aesthetic reasons. The magnetic field in Region 1 could be written as,

$$H_1^z(r, \theta) = \sum_n (a_n J_n(k_0 r) + b_n H_n^{(1)}(k_0 r)) e^{in\theta}, \quad (\text{S2})$$

where  $k_0 = \frac{2\pi}{\lambda}$  is the wave-vector in vacuum ( $\lambda$  is the wavelength in vacuum),  $b_n$  are coefficients of the scattered field to be determined,  $a_n$  are coefficients of the incident field (for an incident plane wave in  $x$ -direction,  $a_n = i^n$ ).  $J_n$  and  $H_n^{(1)}$  are the  $n$ -th order Bessel

Functions and Hankel Functions of the first kind. As  $\varepsilon_r = \infty$ , the magnetic field in Region 2 shall be written as,

$$H_2^z(r, \theta) = gJ_0(k_0 r) + hY_0(k_0 r), \quad (\text{S3})$$

with only the monopole terms ( $J_0$  and  $Y_0$  are the zero-th order Bessel Function and Neumann Function).  $g$  and  $h$  are coefficients to be determined. For Region3, the magnetic field shall be written as,

$$H_3^z(r, \theta) = \sum_n (f_n J_n(\frac{r_2}{r_1} k_0 r)) e^{in\theta}, \quad (\text{S4})$$

where  $f_n$  are coefficients of the inner field to be determined. After matching the continual boundary conditions for  $H^z$  and  $E^\theta$  at  $r = r_1$  and  $r = r_2$ , we can eventually obtain,

$$b_n = a_n \frac{C_n J_n'(k_0 r_2) - D_n J_n(k_0 r_2)}{D_n H_n^{(1)}(k_0 r_2) - C_n H_n^{(1)'}(k_0 r_2)}, \quad (\text{S5})$$

where

$$C_n = \frac{J_1(k_0 r_1) Y_0(k_0 r_2) J_n(k_0 r_2) + J_0(k_0 r_1) Y_0(k_0 r_2) J_n'(k_0 r_2) - Y_1(k_0 r_1) J_0(k_0 r_2) J_n(k_0 r_2) - Y_0(k_0 r_1) J_0(k_0 r_2) J_n'(k_0 r_2)}{Y_0(k_0 r_1) J_1(k_0 r_1) - Y_1(k_0 r_1) J_0(k_0 r_1)} \quad (\text{S6})$$

$$D_n = \frac{Y_1(k_0 r_1) J_1(k_0 r_2) J_n(k_0 r_2) + Y_0(k_0 r_1) J_1(k_0 r_2) J_n'(k_0 r_2) - J_1(k_0 r_1) Y_1(k_0 r_2) J_n(k_0 r_2) - J_0(k_0 r_1) Y_1(k_0 r_2) J_n'(k_0 r_2)}{Y_0(k_0 r_1) J_1(k_0 r_1) - Y_1(k_0 r_1) J_0(k_0 r_1)} \quad (\text{S7})$$

We thereby plot the total scattering cross section  $\sigma = \sum_n |b_n|^2$  as the function of wavelength for

an incident plane wave in  $x$ -direction and for the case of  $r_1 = 1$  and  $r_2 = 2$  in Supplementary Figure S13, where we find that almost zero scattering cross section could be achieved at around  $\lambda = \frac{2}{m}$  ( $m = 1, 2, 3, \dots$ ). If we substitute the asymptotic forms of Bessel Functions, Neumann functions, and Hankel Functions of the first kind into Equation (S5), we will get exact zero value of  $b_n$  at  $k_0(r_2 - r_1) = m\pi$ , which is actually consistent with Equation (5) in the main text.

## Supplementary Figures

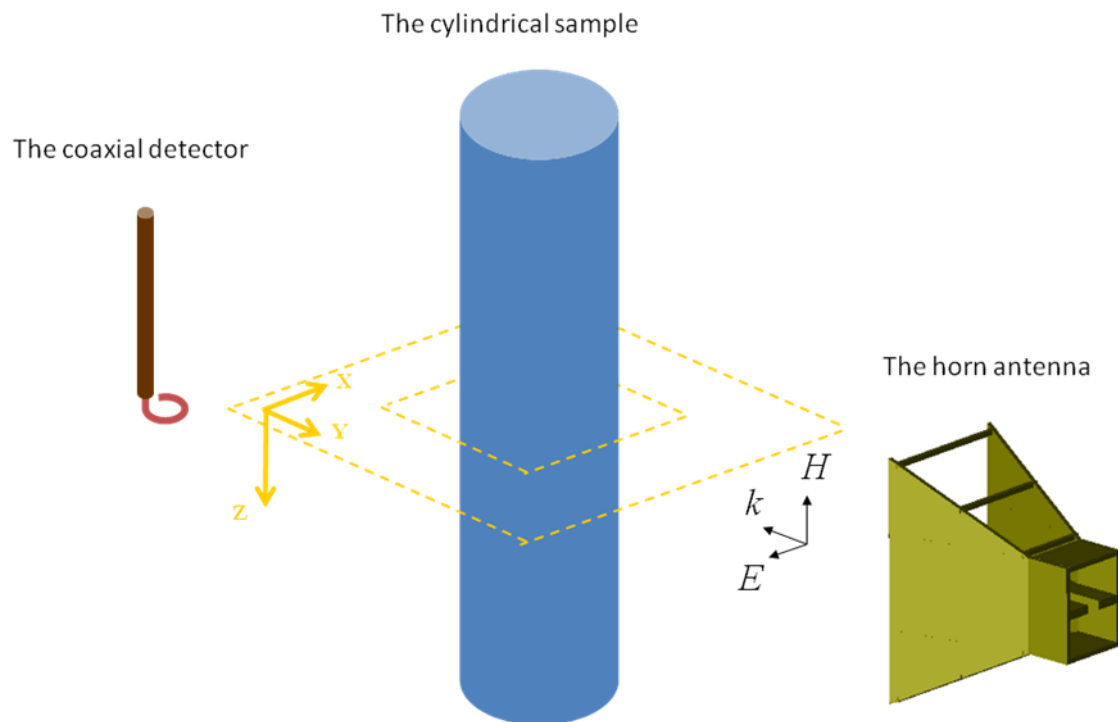

**Supplementary Figure S1. The measurement setup.** In the experiment, the samples are placed vertically with the cylindrical axis orientated along the  $z$ -direction, and a horn-shaped antenna, located  $\sim 100$  cm away from the samples, transmits microwaves toward them with H-field polarized along the vertical direction. The scanning plane, measuring  $300 \times 300$  mm<sup>2</sup>, is located in the middle of the 500 mm high samples to avoid the ending effect.

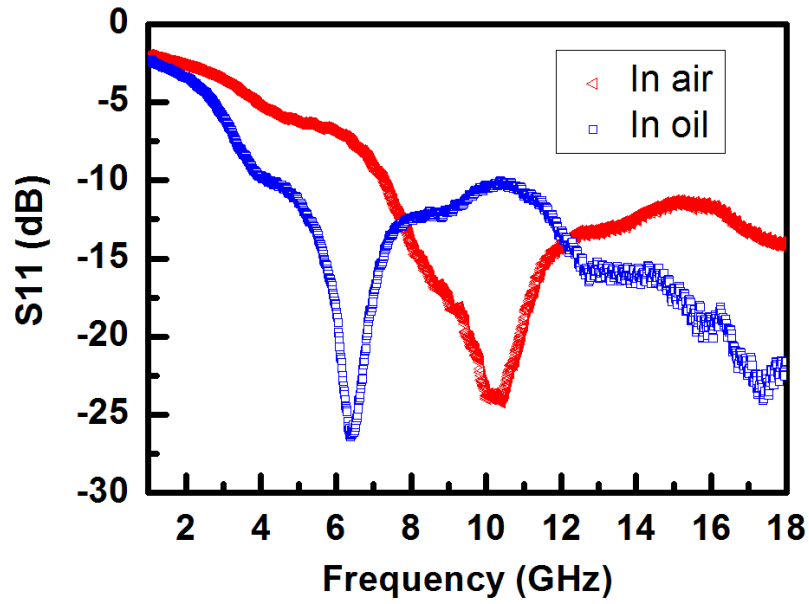

**Supplementary Figure S2. The magnetic response of the detector.** To map the spatial distribution of the  $H_z$  component, we employ a split ring detecting antenna which is made of a coaxial cable and has a circular loop of diameter  $4\text{ mm}$  and a split  $1\text{ mm}$ . Its  $S_{11}$  parameter is characterized first to identify the magnetic response frequency which is shown around  $10\text{GHz}$  in air. When the detector is inserted into the oil, the overall spectrum will downshift, bringing about a change in the radiating/receiving capability of the detector at each specific frequency, for example, one of our working frequencies ( $9.35\text{GHz}$ ). Thus, the scanned field magnitude inside the oil cylinder needs to be corrected to make the direct comparison with the external fields in air.

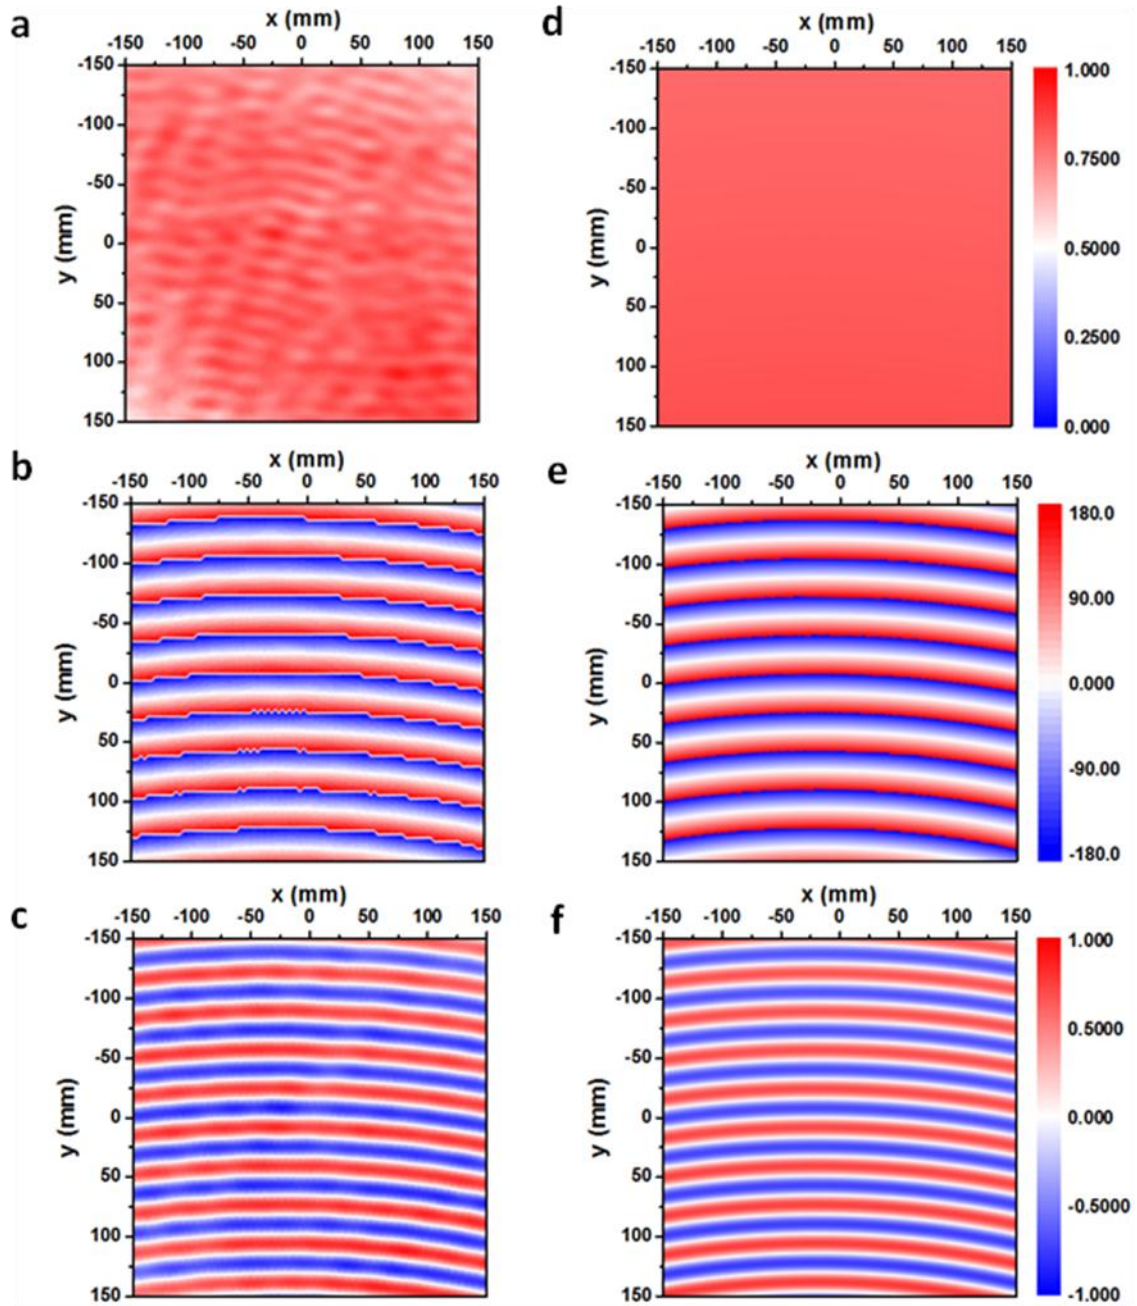

**Supplementary Figure S3. The incident H-field at 9.26GHz in free space.** (a), The magnitude of the measured field; (b), The phase of the measured field; (c), The real part of the measured field; (d), The magnitude of the simulated field; (e), The phase of the simulated field; (f), The real part of the simulated field. It is seen that the field is incident toward the  $-y$  direction and has the quasi-plane wave feature with slightly curved wavefronts.

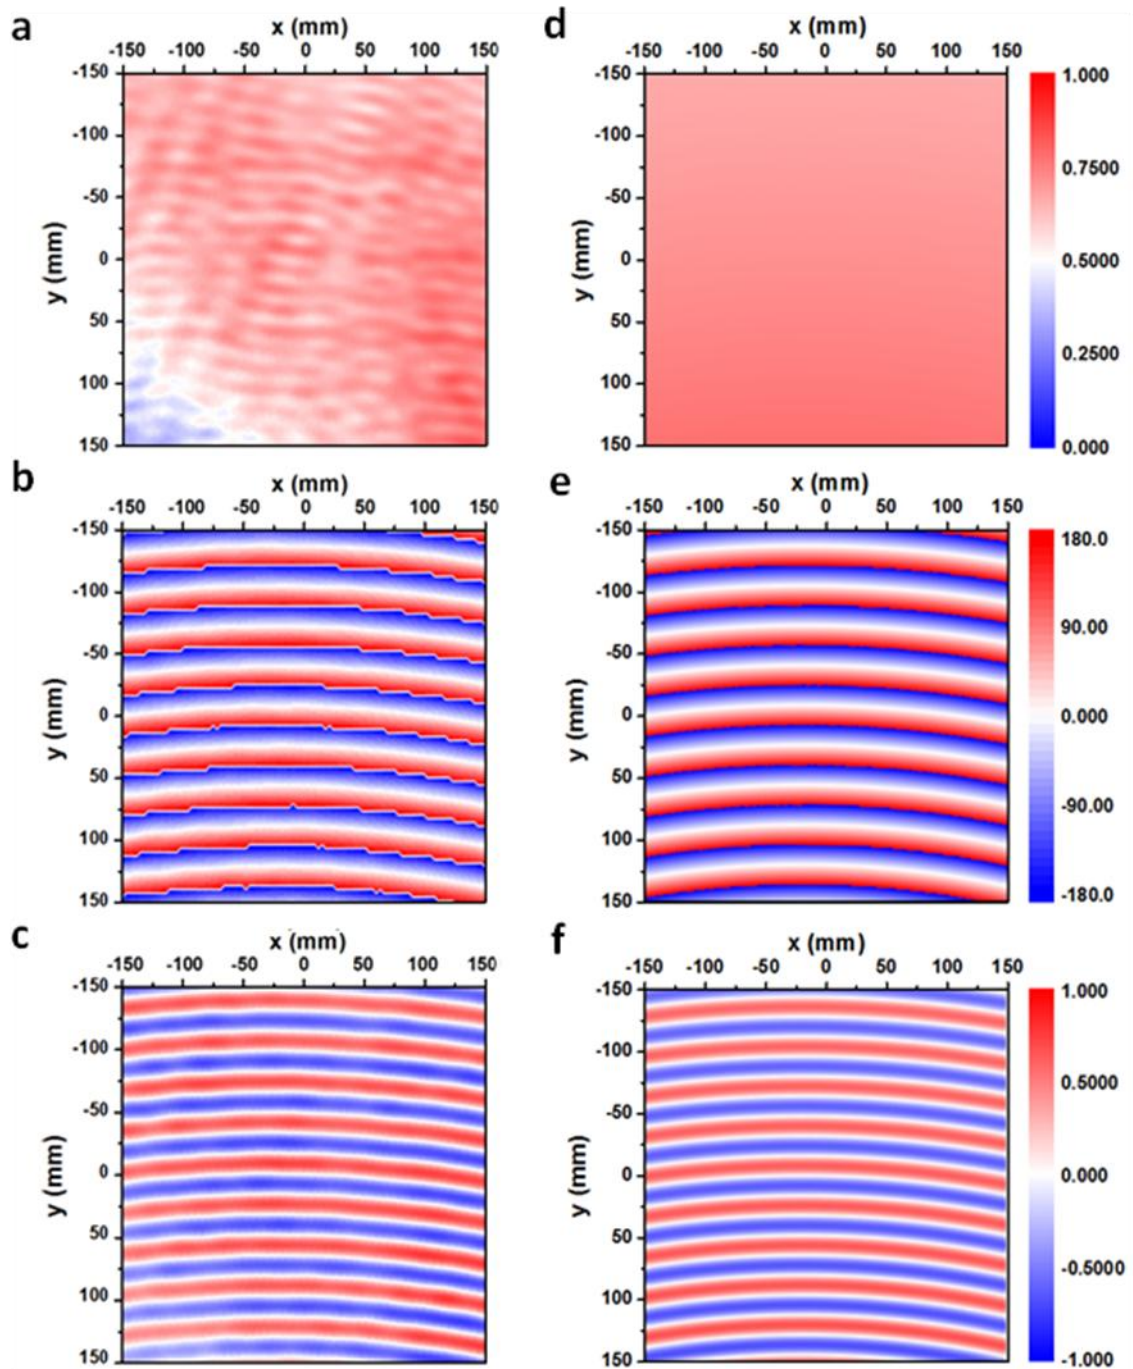

**Supplementary Figure S4. The incident H-field at 9.35GHz in free space.** (a), The magnitude of the measured field; (b), The phase of the measured field; (c), The real part of the measured field; (d), The magnitude of the simulated field; (e), The phase of the simulated field; (f), The real part of the simulated field.

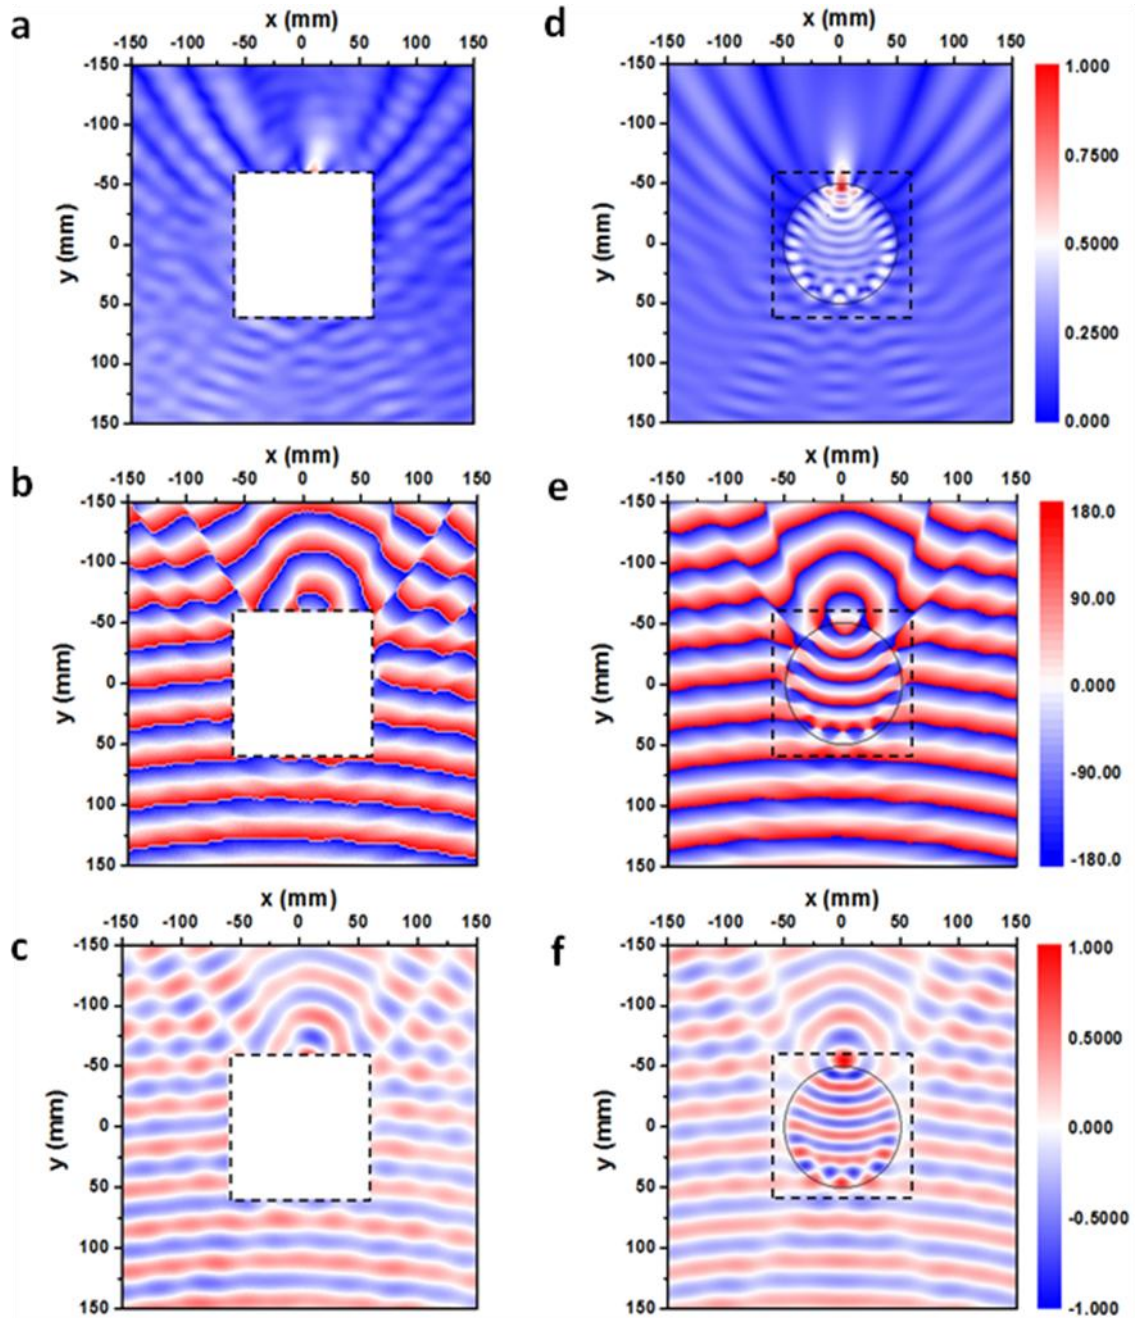

**Supplementary Figure S5. The H-field of the solid Plexiglas cylinder at 9.26GHz.** (a), The magnitude of the measured field; (b), The phase of the measured field; (c), The real part of the measured field; (d), The magnitude of the simulated field; (e), The phase of the simulated field; (f), The real part of the simulated field.



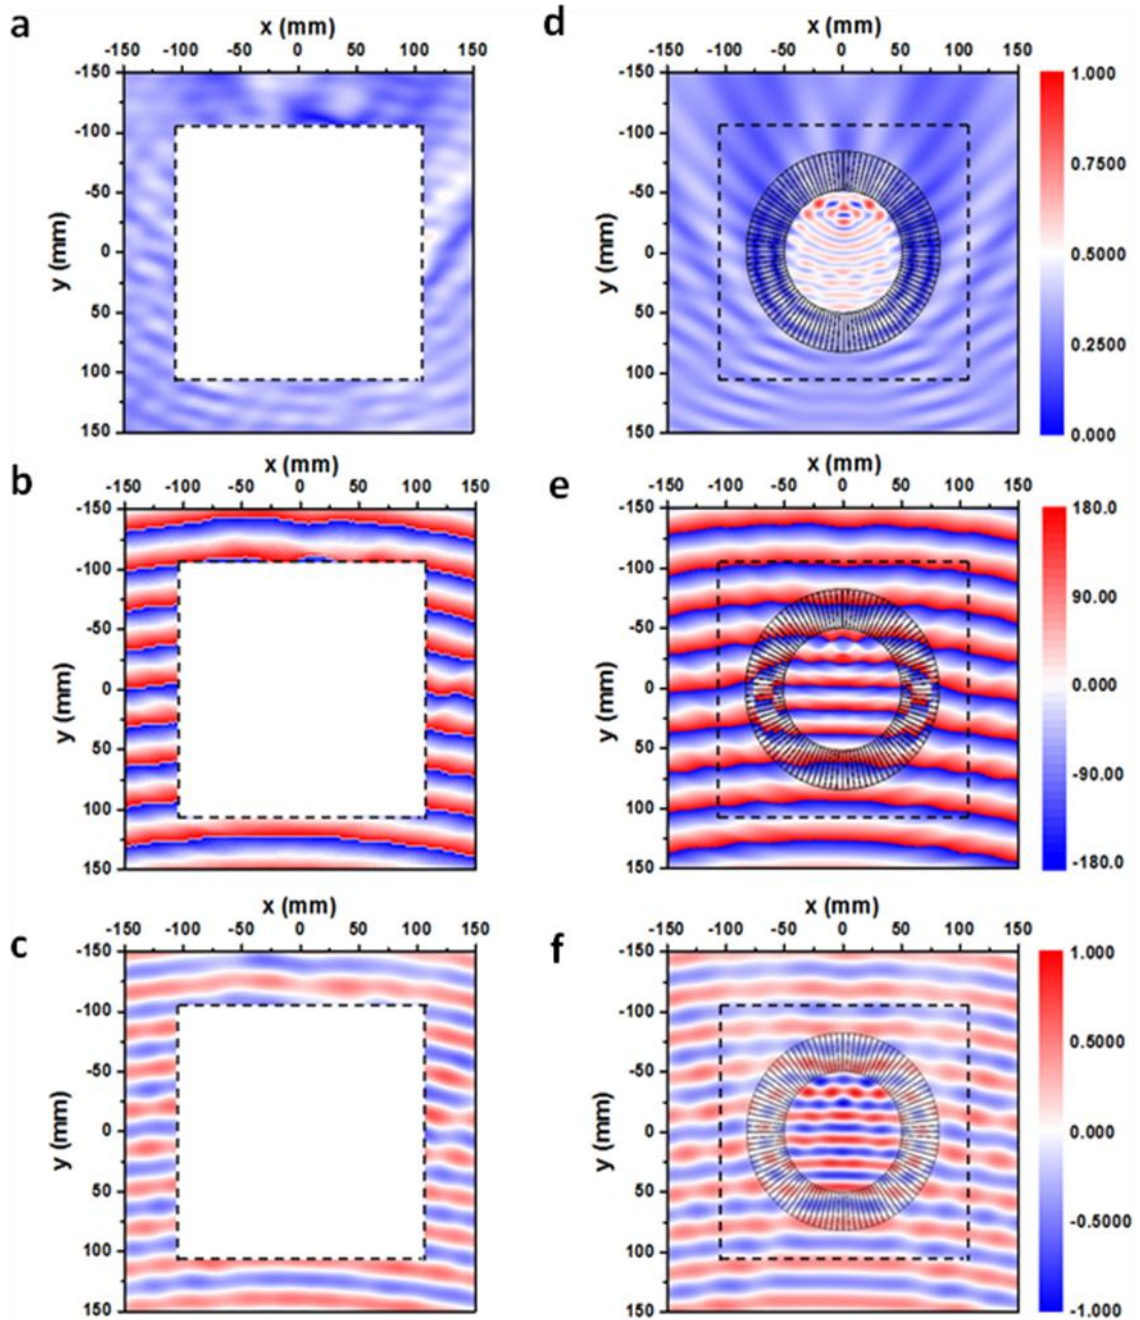

**Supplementary Figure S6. The H-field of the concentrator with the solid Plexiglas cylinder at 9.26GHz.** (a), The magnitude of the measured field; (b), The phase of the measured field; (c), The real part of the measured field; (d), The magnitude of the simulated field; (e), The phase of the simulated field; (f), The real part of the simulated field.

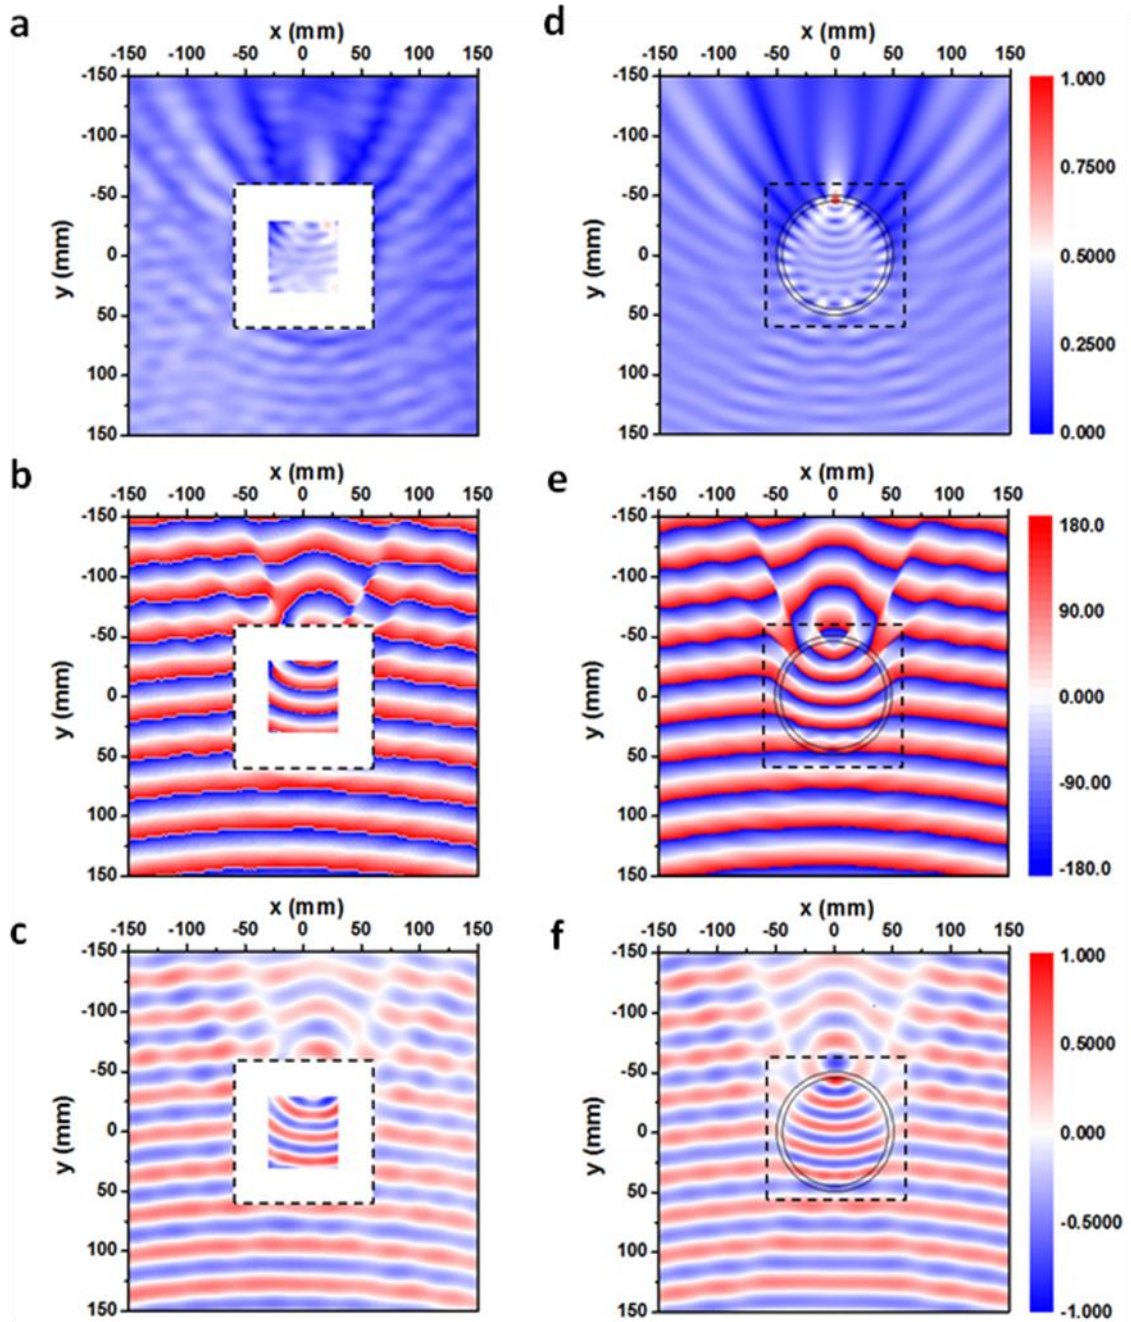

**Supplementary Figure S7. The H-field of the oil cylinder at 9.35GHz.** (a), The magnitude of the measured field; (b), The phase of the measured field; (c), The real part of the measured field; (d), The magnitude of the simulated field; (e), The phase of the simulated field; (f), The real part of the simulated field.

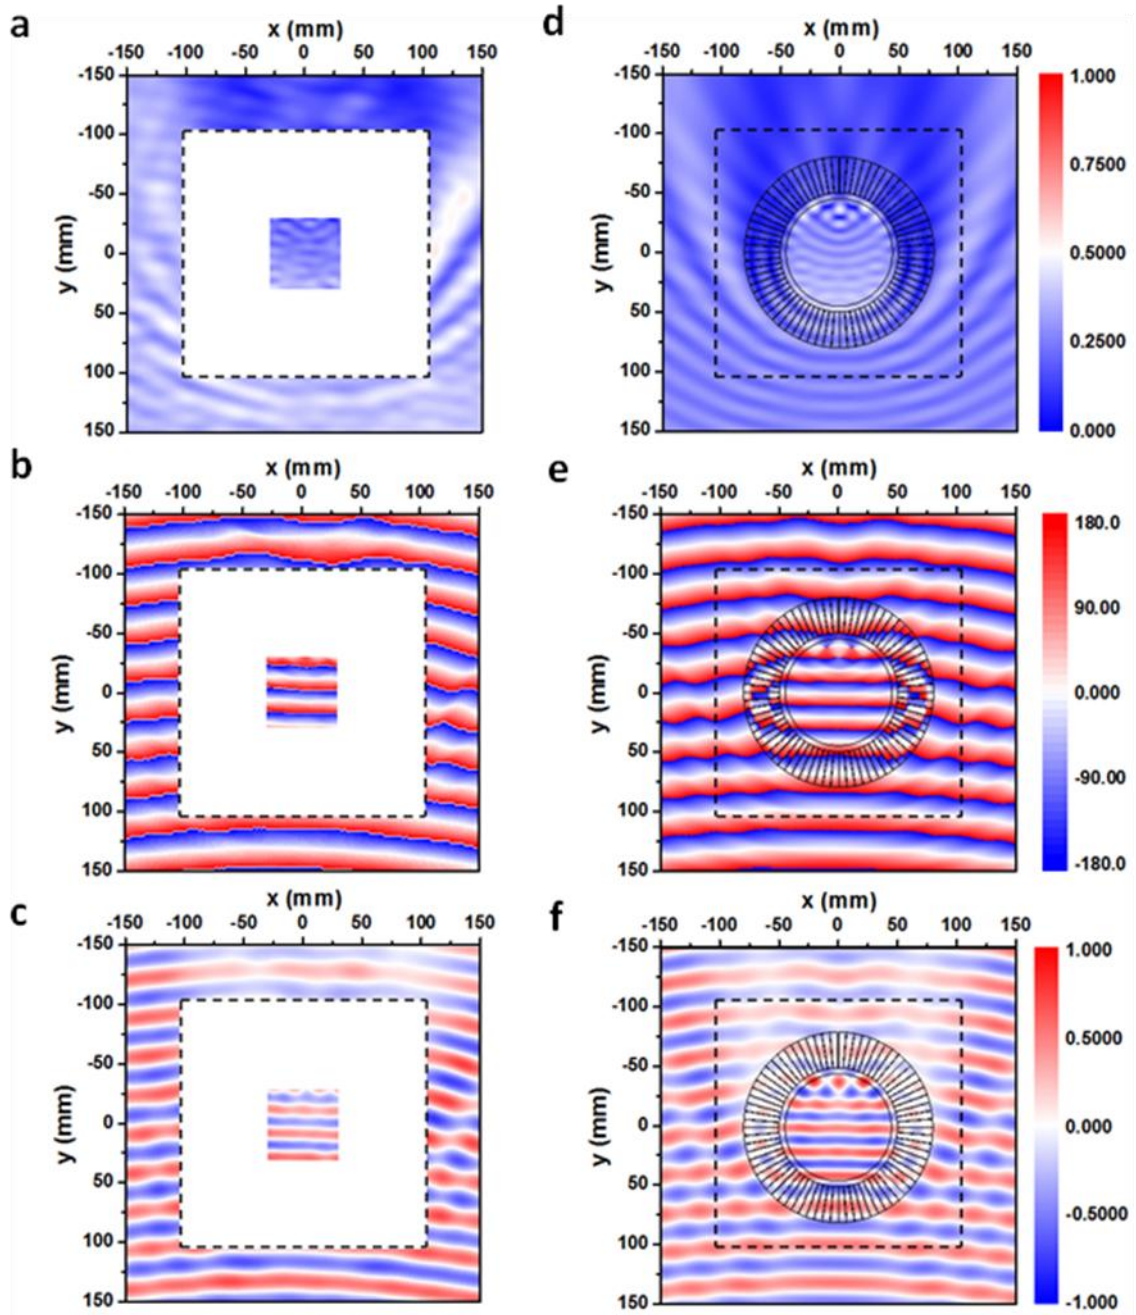

**Supplementary Figure S8. The H-field of the concentrator with the oil cylinder at 9.35GHz.**

(a), The magnitude of the measured field; (b), The phase of the measured field; (c), The real part of the measured field; (d), The magnitude of the simulated field; (e), The phase of the simulated field; (f), The real part of the simulated field.

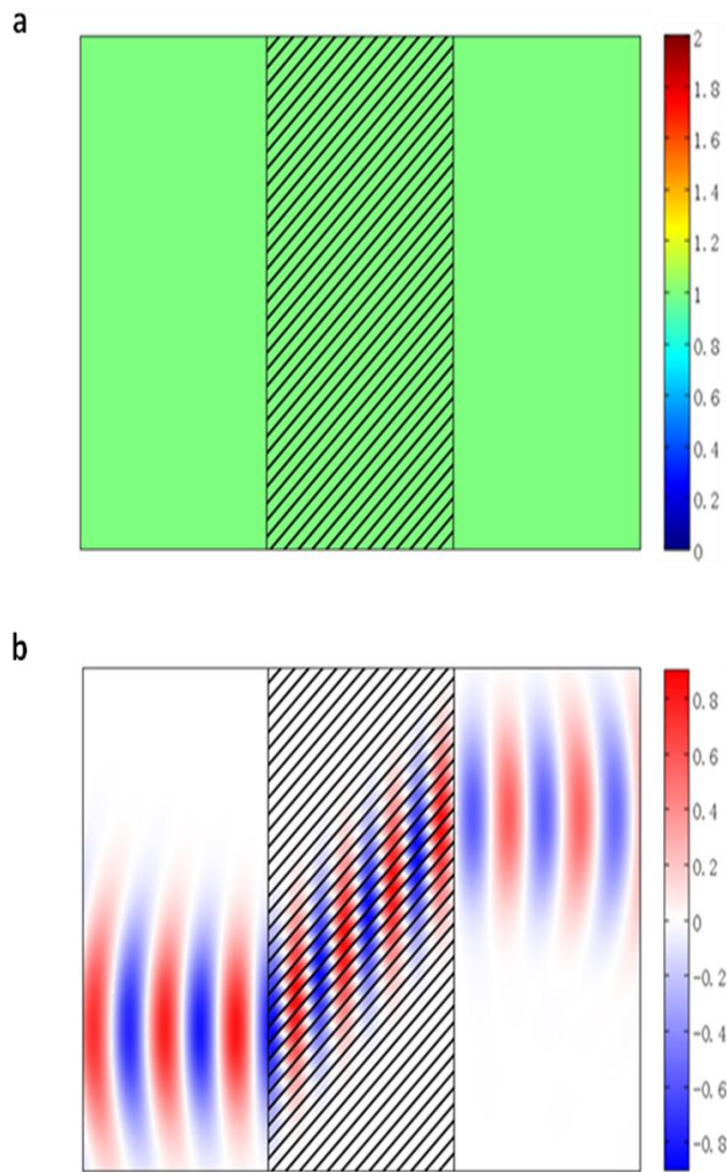

**Supplementary Figure S9. The shifter with FP resonance.** (a), The refractive index profile; (b), The shifting functionality.

**a**

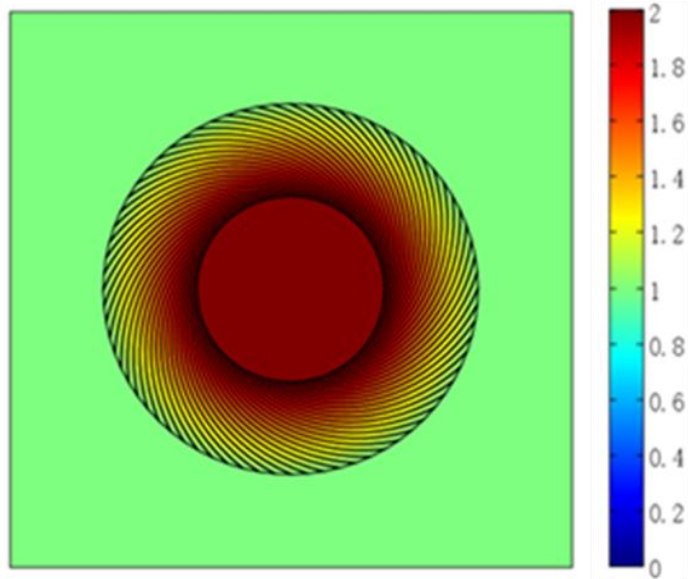

**b**

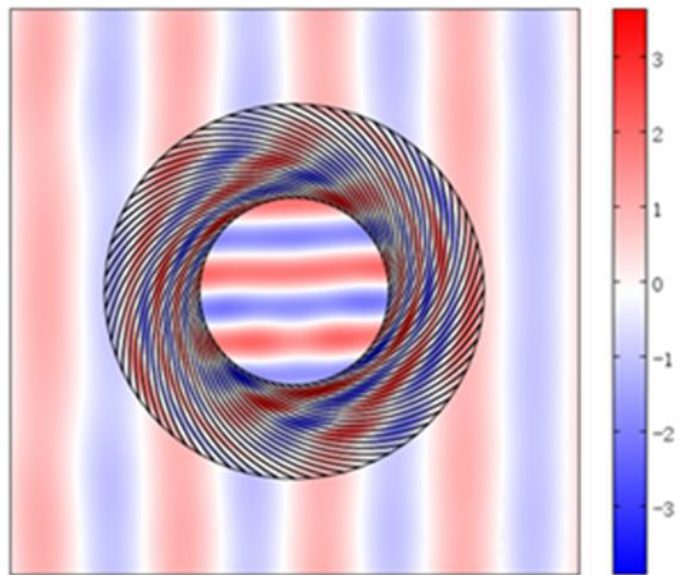

**Supplementary Figure S10. The rotator with FP resonance.** (a), The refractive index profile; (b), The wavefront rotation functionality.

**a**

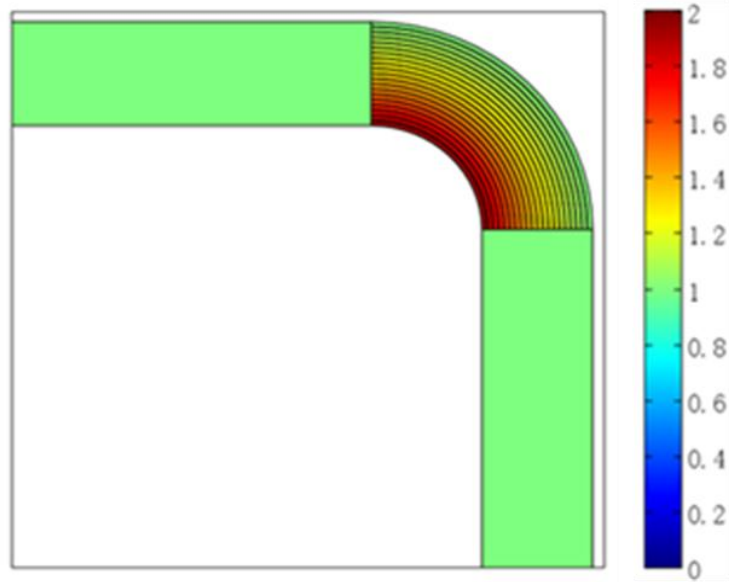

**b**

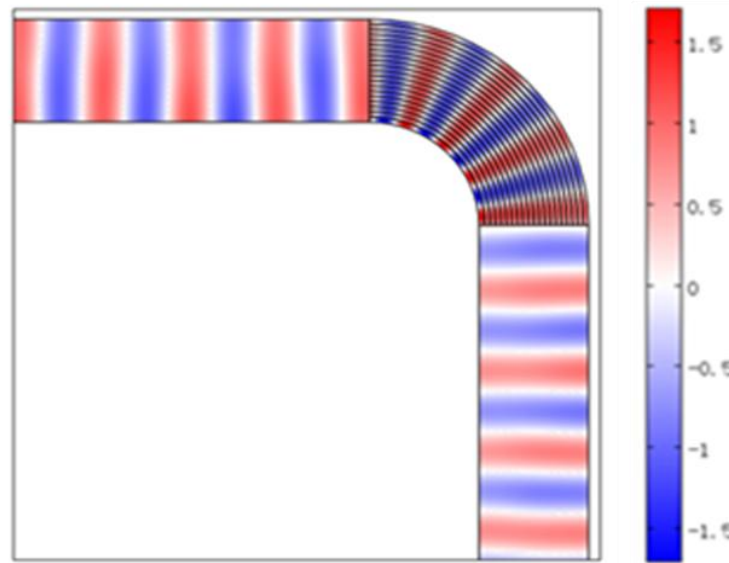

**Supplementary Figure S11. The waveguide bend with FP resonance. (a), The refractive index profile; (b), The wave bending functionality.**

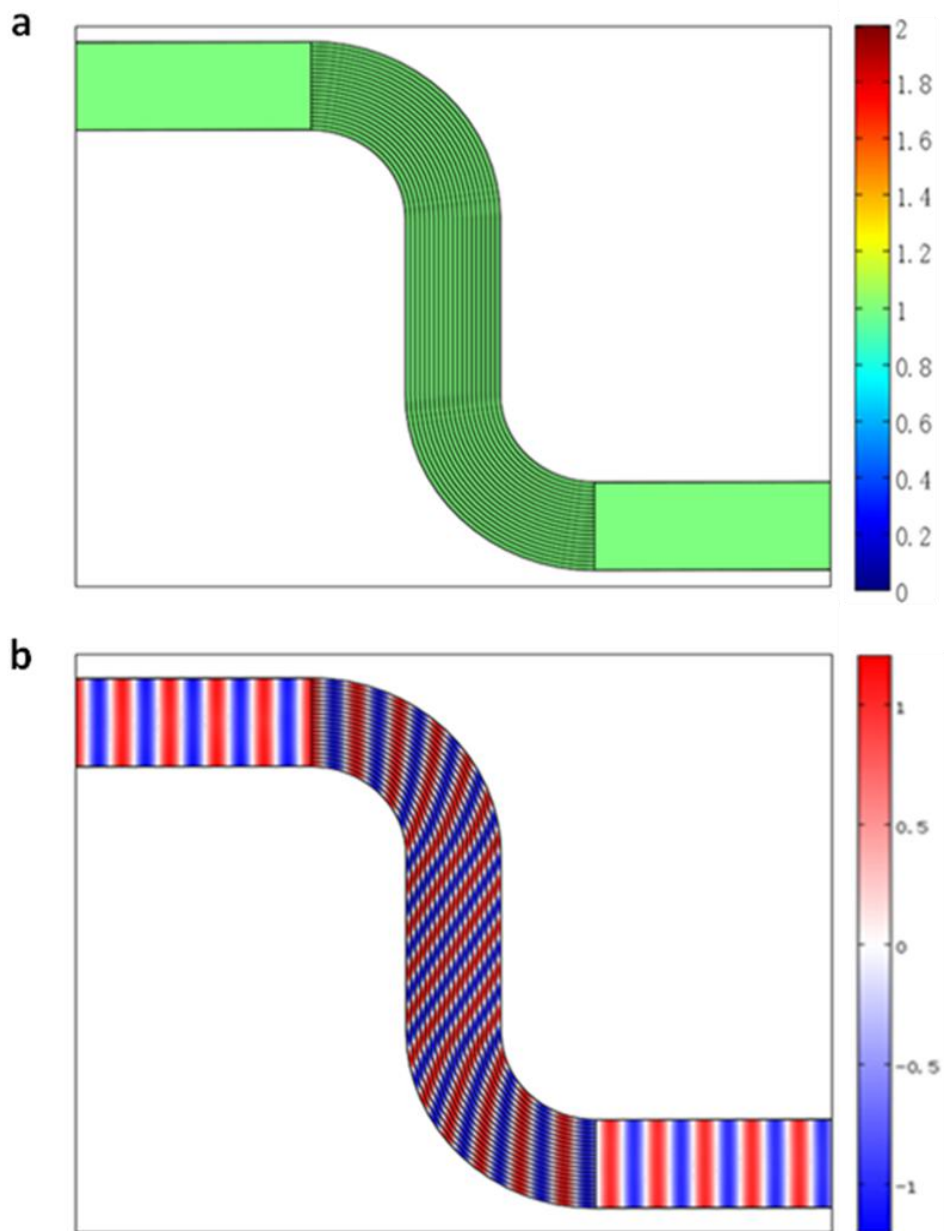

**Supplementary Figure S12. The waveguide periscope with FP resonance.** (a), The refractive index profile; (b), The periscope functionality.

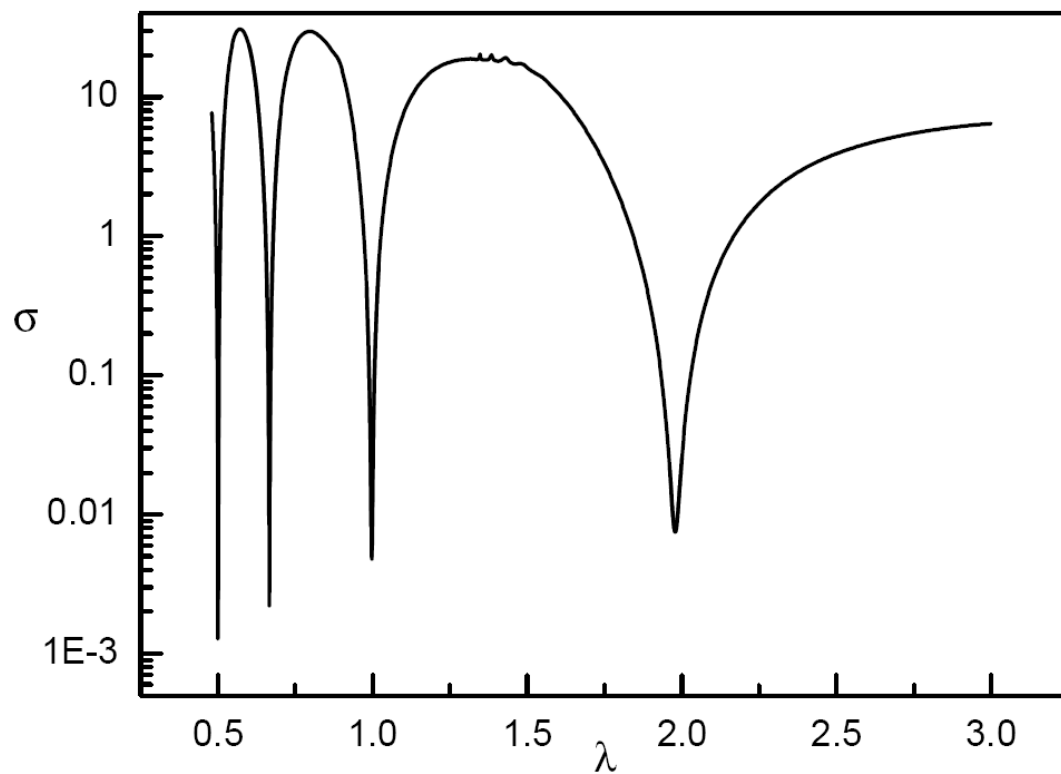

Supplementary Figure S13. The total scattering cross section as the function of wavelength.
